# Supplementary material for: Improvement in hole transporting ability and device performance of quantum dot light emitting diodes
Source: Royal Society of Chemistry journal article supplement (doi:10.1039/c9na00618d), 2019-11-21
Supplement: c9na00618d1.pdf [file c9na00618d1.pdf]

## Improvement in hole transporting ability and device performance in quantum dot light emitting diodes

Pei-Chieh Chiu and Sheng-Hsiung Yang\*

*Institute of Lighting and Energy Photonics, College of Photonics, National Chiao*

*Tung University*

*No.301, Gaofa 3<sup>rd</sup> Road, Guiren District, Tainan City 71150, Taiwan R.O.C.*

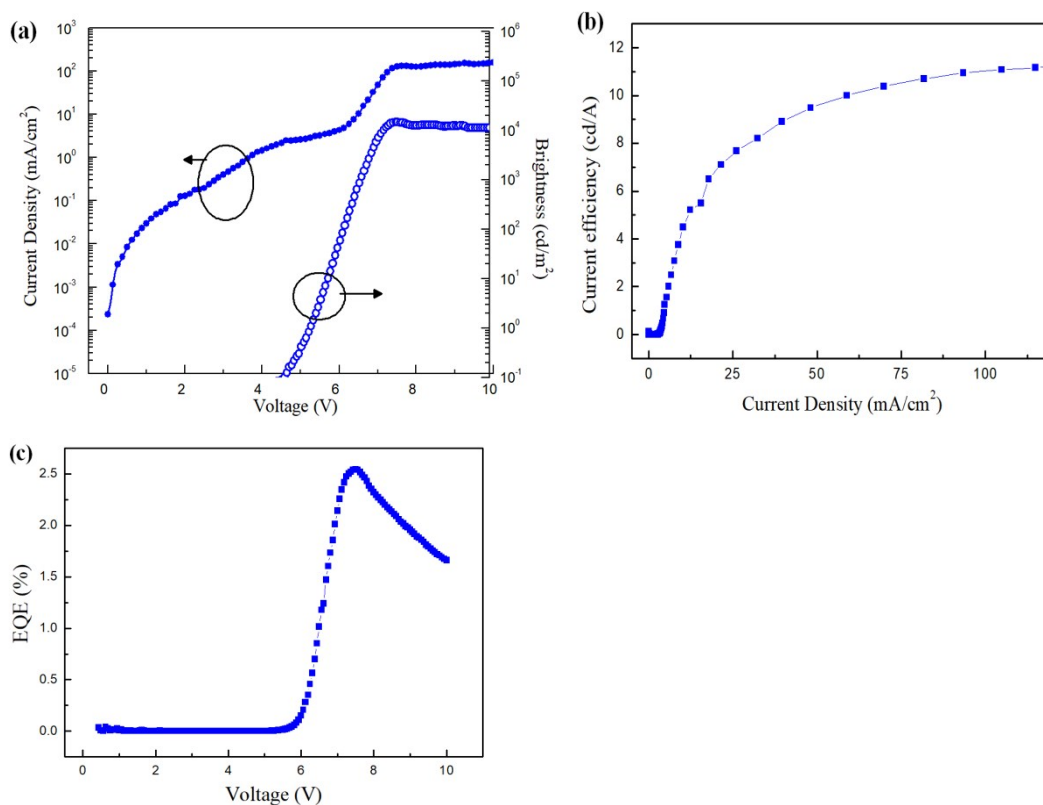

Figure S1. (a) Current density–voltage–brightness, (b) current efficiency–current density and (c) EQE–voltage characteristics of the device ITO/PEDOT:PSS/PVK/CdSe QDs/ZnO NPs/Al.

Table S1. Performance of the device ITO/PEDOT:PSS/PVK/ CdSe QDs/ZnO NPs/Al.

| Turn-on voltage <sup>a</sup> | Max brightness         | Max current efficiency | Max EQE   |
|------------------------------|------------------------|------------------------|-----------|
| (V)                          | [cd/m <sup>2</sup> @V] | [cd/A @V]              | [% @V]    |
| 5.3                          | 14,673 @7.56           | 11.27 @7.5             | 2.54 @7.5 |

<sup>a</sup> defined as the operating voltage when the brightness reached 1 cd/m<sup>2</sup>.

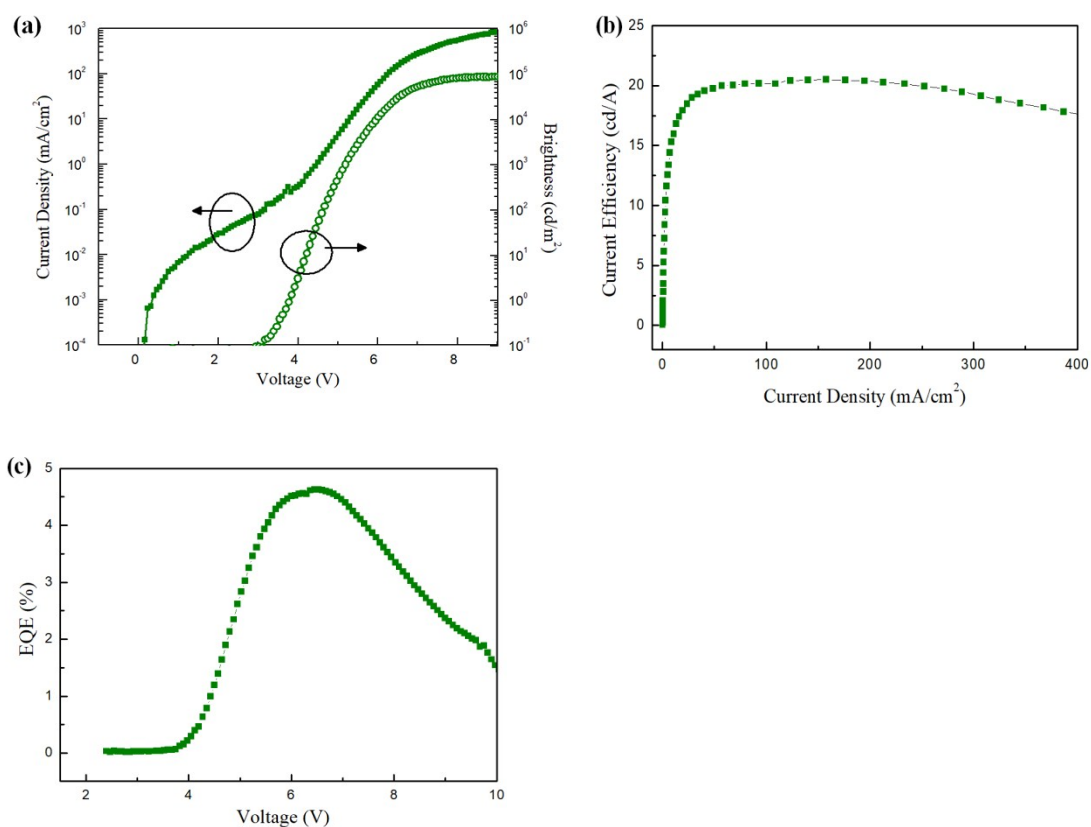

Figure S2. (a) Current density–voltage–brightness, (b) current efficiency–current density and (c) EQE–voltage characteristics of the device ITO/PEDOT:PSS+0.5 wt% BYK-P105/PVK/CdSe QDs/ZnO NPs/PEIE/LiF/Al.

Table S2. Performance of the device ITO/PEDOT:PSS+0.5 wt% BYK-P105/PVK/  
CdSe QDs/ZnO NPs/PEIE/LiF/Al.

| Turn-on voltage <sup>a</sup> | Max brightness         | Max current efficiency | Max EQE  |
|------------------------------|------------------------|------------------------|----------|
| (V)                          | [cd/m <sup>2</sup> @V] | [cd/A @V]              | [% @V]   |
| 3.8                          | 111,458 @9.9           | 20.5 @6.5              | 4.6 @6.5 |

<sup>a</sup> defined as the operating voltage when the brightness reached 1 cd/m<sup>2</sup>.

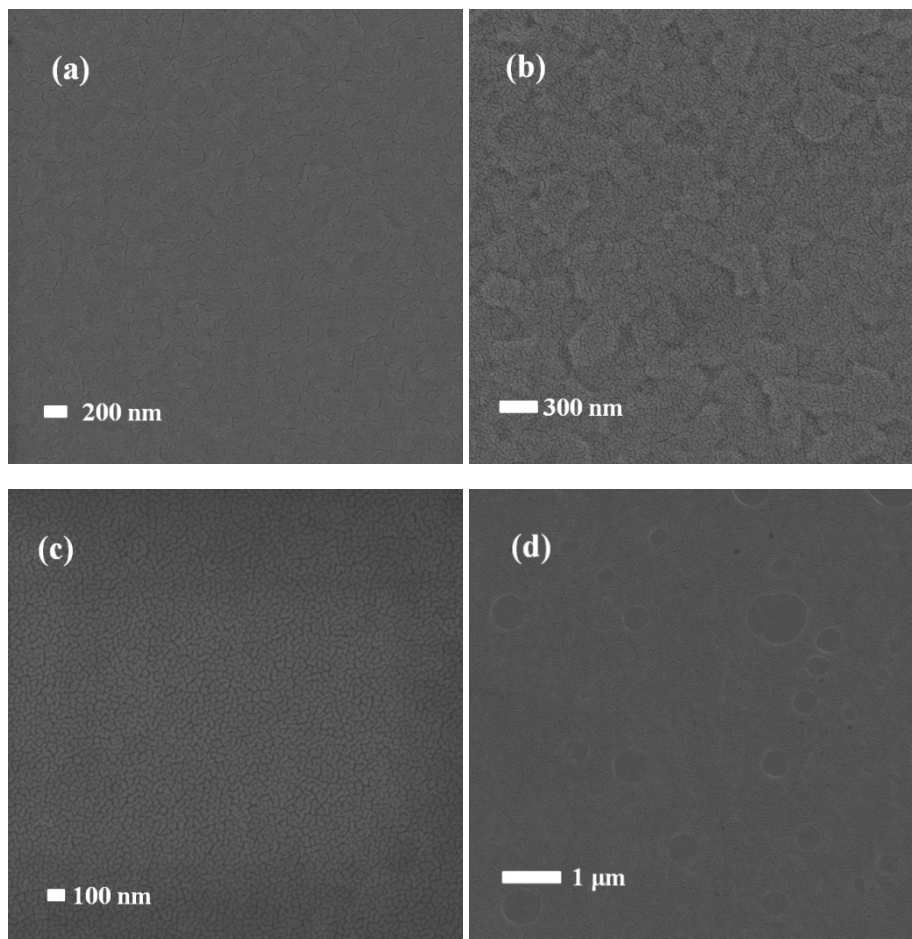

Figure S3. Top-view SEM images of (a) PEDOT:PSS, (b) PEDOT:PSS+BYK-P105, (c) PVK and (d) PVK+BYK-P105 thin films.
